# Supplementary material for: “This Isn’t Just about Things, It’s about People and Their Future”: A Qualitative Analysis of the Working Conditions and Strains of Social Workers in Refugee and Homeless Aid
Source: MDPI journal article supplement (doi:10.3390/ijerph16203858), 2019-10-12
Supplement: s1 [file s1]

**Table S1.** Case list of respondents not suffering from and respondents suffering from resultant psychological strain on multiple (>1) reported job demands and resources

| ID                                                    | Area of work | Gender, age (years) | Qualification           | Professional experience (years) | Job content                                                                                                                                                                                                                                              | Work organisation                                                                                                                                               | Social relations                                                                                                       | Work environment                                          | New forms of work |
|-------------------------------------------------------|--------------|---------------------|-------------------------|---------------------------------|----------------------------------------------------------------------------------------------------------------------------------------------------------------------------------------------------------------------------------------------------------|-----------------------------------------------------------------------------------------------------------------------------------------------------------------|------------------------------------------------------------------------------------------------------------------------|-----------------------------------------------------------|-------------------|
| Workers <u>without</u> resultant psychological strain |              |                     |                         |                                 |                                                                                                                                                                                                                                                          |                                                                                                                                                                 |                                                                                                                        |                                                           |                   |
| #1                                                    | HA           | F, 31–50            | Career-changer          | ≤3                              | <u>Demands:</u><br>Emotional demands, heavy workload, exaggerated expectations of clients, motivational work, paperwork<br><u>Resources:</u><br>Appreciation expressed by clients, experience of success, pleasure in working with people/client contact | <u>Demands:</u><br>Staffing shortages, time pressure, cooperation with public authorities/other offices<br><u>Resources:</u><br>Good planning of break periods  | <u>Resources:</u><br>Good team atmosphere, support and appreciation from team                                          |                                                           |                   |
| #17                                                   | HA           | M, >50              | Career-changer          | 4–10                            | <u>Demands:</u><br>Emotional demands, cultural/language barriers, experience of violence, limited solutions (clients reject help)<br><u>Resources:</u><br>Appreciation expressed by clients, pleasure in working with people/client contact              | <u>Demands:</u><br>Being alone on duty<br><u>Resources:</u><br>Exchange through handover meetings                                                               | <u>Resources:</u><br>Good team atmosphere, support and appreciation from team, support and appreciation from superiors | <u>Demands:</u><br>Lack of quiet/break rooms              |                   |
| #18                                                   | HA           | F, >50              | Social education worker | ≤3                              | <u>Demands:</u><br>Limited solutions (structural conditions, clients reject help), role conflicts<br><u>Resources:</u><br>Appreciation expressed by clients, pleasure in working with people/client contact, diversity of work                           | <u>Demands:</u><br>Cooperation with public authorities/other offices<br><u>Resources:</u><br>Good planning of break periods, exchange through handover meetings | <u>Resources:</u><br>Good team atmosphere, support from team, support and appreciation from superiors                  | <u>Demands:</u><br>Work involving long periods of sitting |                   |

| ID                                                           | Area of work | Gender, age (years) | Qualification           | Professional experience (years) | Job content                                                                                                                                                                                                                                                                                                                               | Work organisation                                                                                                                                | Social relations                                                                                           | Work environment | New forms of work |
|--------------------------------------------------------------|--------------|---------------------|-------------------------|---------------------------------|-------------------------------------------------------------------------------------------------------------------------------------------------------------------------------------------------------------------------------------------------------------------------------------------------------------------------------------------|--------------------------------------------------------------------------------------------------------------------------------------------------|------------------------------------------------------------------------------------------------------------|------------------|-------------------|
| #19                                                          | RA           | M, >50              | Career-changer          | ≤3                              | <u>Demands:</u><br>Emotional demands, exaggerated expectations of clients, limited solutions (legal requirements), paperwork<br><u>Resources:</u><br>Appreciation expressed by clients, experience of success                                                                                                                             | <u>Demands:</u><br>Staffing shortages, overtime, job insecurity                                                                                  | <u>Resources:</u><br>Good team atmosphere, support from team, appreciation from superiors                  |                  |                   |
| #23                                                          | HA           | M, >50              | Social education worker | >10                             | <u>Demands:</u><br>Heavy workload, motivational work, experience of violence, limited solutions (lack of adequate services, clients reject help), poor planning options<br><u>Resources:</u><br>Appreciation expressed by clients, pleasure in working with people/client contact                                                         | <u>Demands:</u><br>Staffing shortages                                                                                                            | <u>Resources:</u><br>Good team atmosphere, support and appreciation from team, appreciation from superiors |                  |                   |
| Workers <u>with</u> long-term resultant psychological strain |              |                     |                         |                                 |                                                                                                                                                                                                                                                                                                                                           |                                                                                                                                                  |                                                                                                            |                  |                   |
| #3                                                           | HA           | F, 31–50            | Social worker           | ≤3                              | <u>Demands:</u><br>Emotional demands, varying and heavy workload, exaggerated expectations of clients, limited solutions (structural conditions, clients reject help), role conflicts<br><u>Resources:</u><br>Appreciation expressed by clients, experience of success, pleasure in working with people/client contact, diversity of work | <u>Demands:</u><br>Cooperation with public authorities/other offices, poor financial compensation<br><u>Resources:</u><br>Flexible working hours | <u>Resources:</u><br>Good team atmosphere, support and appreciation from team, support from superiors      |                  |                   |

| ID | Area of work | Gender, age (years) | Qualification | Professional experience (years) | Job content                                                                                                                                                                                                                                                                                                      | Work organisation                                                                                                                                                                                                                                    | Social relations                                                                                                                                                                   | Work environment | New forms of work                                      |
|----|--------------|---------------------|---------------|---------------------------------|------------------------------------------------------------------------------------------------------------------------------------------------------------------------------------------------------------------------------------------------------------------------------------------------------------------|------------------------------------------------------------------------------------------------------------------------------------------------------------------------------------------------------------------------------------------------------|------------------------------------------------------------------------------------------------------------------------------------------------------------------------------------|------------------|--------------------------------------------------------|
| #4 | RA           | F, ≤30              | Social worker | ≤3                              | <u>Demands:</u><br>Emotional demands, heavy workload, too many clients, cultural/language barriers, demanding clients, limited solutions (legal requirements), role conflicts, poor planning options<br><u>Resources:</u><br>Experience of success                                                               | <u>Demands:</u><br>Overtime, time pressure, work disruptions, cooperation with public authorities/other offices, supervision not viewed as helpful                                                                                                   | <u>Demands:</u><br>Different perspectives/work methods in team, inadequate support from superiors<br><u>Resources:</u><br>Good team atmosphere, support and appreciation from team |                  |                                                        |
| #5 | RA           | F, 31–50            | Social worker | ≤3                              | <u>Demands:</u><br>Emotional demands, heavy workload, too many clients, limited solutions (legal requirements, not enough adequate services), role conflicts<br><u>Resources:</u><br>Appreciation expressed by clients, experience of success, pleasure in working with people/client contact, diversity of work | <u>Demands:</u><br>Staffing shortages, unqualified personnel, overtime, shift duty, cooperation with public authorities/other offices, supervision not viewed as helpful, poor financial compensation<br><u>Resources:</u><br>Flexible working hours | <u>Resources:</u><br>Good team atmosphere, support from team, support and appreciation from superiors                                                                              |                  | <u>Demands:</u><br>Dissolution of work/life boundaries |
| #6 | RA           | F, ≤30              | Educator      | ≤3                              | <u>Demands:</u><br>Emotional demands, cultural/language barriers, experience of violence, limited solutions to difficult cases, poor planning options                                                                                                                                                            | <u>Demands:</u><br>Unqualified personnel, shift duty, cooperation with public authorities/other offices, inadequate supervision, job insecurity                                                                                                      | <u>Demands:</u><br>Performance pressure in team<br><u>Resources:</u><br>Good team atmosphere, support and appreciation                                                             |                  |                                                        |

| ID  | Area of work | Gender, age (years) | Qualification      | Professional experience (years) | Job content                                                                                                                                                                                                                                                                                         | Work organisation                                                                                                                            | Social relations                                                                                                                                                                                                                                            | Work environment                                                                                        | New forms of work                                      |
|-----|--------------|---------------------|--------------------|---------------------------------|-----------------------------------------------------------------------------------------------------------------------------------------------------------------------------------------------------------------------------------------------------------------------------------------------------|----------------------------------------------------------------------------------------------------------------------------------------------|-------------------------------------------------------------------------------------------------------------------------------------------------------------------------------------------------------------------------------------------------------------|---------------------------------------------------------------------------------------------------------|--------------------------------------------------------|
|     |              |                     |                    |                                 | <u>Resources:</u><br>Appreciation expressed by clients, experience of success, pleasure in working with people/client contact                                                                                                                                                                       |                                                                                                                                              | from team, support from superiors                                                                                                                                                                                                                           |                                                                                                         |                                                        |
| #24 | RA           | F, ≤30              | Remedial therapist | ≤3                              | <u>Demands:</u><br>Emotional demands, varying and heavy workload, too many clients, exaggerated expectations of clients, demanding clients, experience of violence<br><br><u>Resources:</u><br>Appreciation expressed by clients, pleasure in working with people/client contact, diversity of work | <u>Demands:</u><br>Too few staff on duty, cooperation with public authorities/other offices, inadequate supervision, inadequate job training | <u>Demands:</u><br>Conflicts in team, inadequate support from superiors<br><br><u>Resources:</u><br>Good team atmosphere, support and appreciation from team                                                                                                | <u>Demands:</u><br>Overfilled facility                                                                  |                                                        |
| #25 | RA           | M, 31–50            | Educator           | ≤3                              | <u>Demands:</u><br>Emotional demands, varying workload, exaggerated expectations of clients, demanding clients, limited solutions (structural conditions), role conflicts, paperwork<br><br><u>Resources:</u><br>Experience of success, pleasure in working with people/client contact              | <u>Demands:</u><br>Work disruptions, cooperation with public authorities/other offices, job insecurity, inadequate job training              | <u>Demands:</u><br>Different perspectives/work methods in team, conflicts/gossip, inadequate support and lack of organisational coordination in team, inadequate support from superiors<br><br><u>Resources:</u><br>Good team atmosphere, support from team | <u>Demands:</u><br>Overfilled facility, too few PC workstations, work involving long periods of sitting | <u>Demands:</u><br>Dissolution of work/life boundaries |

| ID  | Area of work | Gender, age (years) | Qualification           | Professional experience (years) | Job content                                                                                                                                                                                                                                                                                                           | Work organisation                                                                                                     | Social relations                                                                                                                                                            | Work environment                                                      | New forms of work |
|-----|--------------|---------------------|-------------------------|---------------------------------|-----------------------------------------------------------------------------------------------------------------------------------------------------------------------------------------------------------------------------------------------------------------------------------------------------------------------|-----------------------------------------------------------------------------------------------------------------------|-----------------------------------------------------------------------------------------------------------------------------------------------------------------------------|-----------------------------------------------------------------------|-------------------|
| #26 | RA           | F, >50              | Social education worker | >10                             | <u>Demands:</u><br>Heavy workload, experience of violence, motivational work, limited solutions (structural conditions, lack of adequate services), paperwork<br><br><u>Resources:</u><br>Appreciation expressed by clients, experience of success, pleasure in working with people/client contact, diversity of work | <u>Demands:</u><br>Being alone on duty, shift duty, cooperation with public authorities/other offices, job insecurity | <u>Demands:</u><br>Inadequate support and lack of organisational coordination in team, inadequate support from superiors<br><br><u>Resources:</u><br>Advice from colleagues | <u>Demands:</u><br>Lack of quiet/break rooms, too few PC workstations |                   |

Abbreviations: HA = Homeless aid, RA = Refugee aid, F = Female, M = Male
